# Supplementary material for: Diffusion-dominated redox performance of hydrated copper molybdate for high-performance energy storage
Source: Royal Society of Chemistry journal article supplement (doi:10.1039/d4qi02229g), 2024-01-01
Supplement: d4qi02229g1.pdf [file d4qi02229g1.pdf]

## Supporting Information

### **Diffusion-dominated redox performance of hydrated copper molybdate for high-performance energy storage**

Mohammed Kuku<sup>1\*</sup>, Sultan Althahban,<sup>1</sup> Mohammad Arishi<sup>2</sup>

1 Department of Mechanical Engineering, College of Engineering and Computer Sciences, Jazan University, Jazan 45142, Saudi Arabia

2 Department of Chemical Engineering, College of Engineering and Computer Sciences, Jazan University, Jazan 45142, Saudi Arabia

Corresponding author: [mkuku@jazanu.edu.sa](mailto:mkuku@jazanu.edu.sa)

**Physical Characterization:** Scanning electron microscopy (SEM, ZEISS Sigma 500, field emission scanning electron microscope) was used to examine the morphology and microstructure of the synthesized materials. X-ray diffraction (XRD, Malvern Panalytical Aeris X-ray diffractometer) analysis was performed to assess the crystalline properties of the binder-free electrodes. X-ray photoelectron spectroscopy (XPS, Thermo NEXSA XPS instrument fitted with a monochromate, Al  $K\alpha$  X-ray source) analysis was performed to analyze the chemical valency states of the materials. The structure of CMO was investigated by a Fourier transform infrared spectrometer (FT-IR; Shimadzu 8900, Kyoto, Japan).

**Electrochemical measurements:**

The electrochemical properties of the as-prepared hybrid electrodes were studied on a Biologic electrochemical analyzer using a beaker-based three-electrode cell system with an electrolyte solution of 1M KOH. The Ni foam coated with the CMO<sub>AH</sub> or CMO<sub>BH</sub> electrode was used as the working electrode, a platinum mesh and an Ag/AgCl electrode were used as the counter and reference electrode, orderly. The cyclic voltammetry tests were conducted in the voltage window of 0 to 0.6 V at different scan rates. The galvanostatic charge-discharge tests were carried out at different current densities within a potential range of 0 to 0.5 V. Electrochemical impedance spectroscopy was recorded at open-circuit voltage with 20 mV amplitude in a frequency range from 0.01 Hz to 100 kHz in a 1 M KOH. The specific capacitance of the electrode in three-electrode mode was calculated from the GCD curves according to the following equation  $C = \frac{I \times \Delta t}{m \times \Delta V}$ , where C is the specific capacitance (F/g or F/cm<sup>2</sup>), I is the discharge current (A),  $\Delta t$  is the discharge time (s),  $\Delta V$  is the potential window (V), and m is the mass of the active material (g). The specific energy (E) and specific power (P) of the electrodes were calculated from the following

equations:  $E = \frac{I \times \Delta V^2}{m \times \Delta V}$ ;  $P = \frac{E}{\Delta t}$ , where E is the specific energy (Wh/kg), C is the specific capacitance (F/g),  $\Delta V$  is the potential range (V), P is the specific power (W/kg) and  $\Delta t$  is the discharge time (s).

### **Coin-cell type asymmetric supercapacitor (ASC)**

The device was assembled in a coin-cell using CMO as binder-free electrode and commercial activated carbon composite was used as negative electrode. The negative electrode was prepared by casting a slurry of the electroactive material: activated carbon, carbon black and polytetrafluoroethylene (PTFE) binder with a weight ratio of 8:1:1 in N-methyl-2-pyrrolidone (NMP) onto a nickel foam current collector and then the electrode was pressed and dried at 60 °C overnight. To assemble the cell, the negative electrode and positive electrode were face to face placed in between the filter paper, in which 1M KOH was added as the electrolyte.

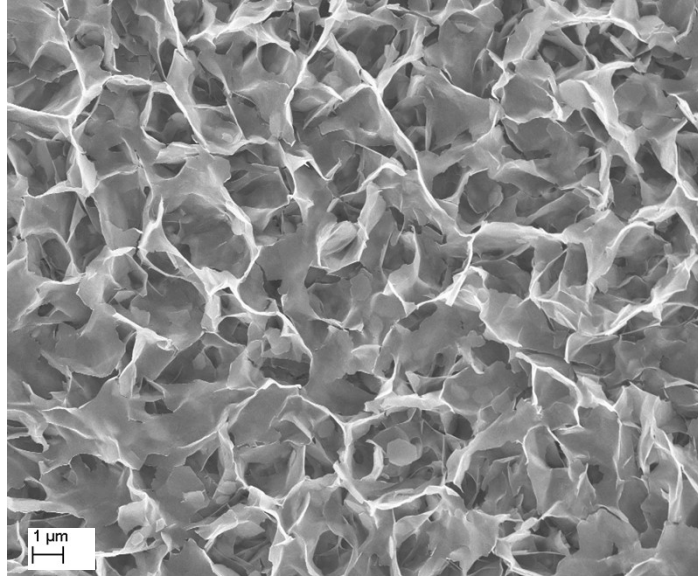

**Figure S1.** SEM image of COM<sub>AH</sub> electrode showing the porous sheet-like structures.

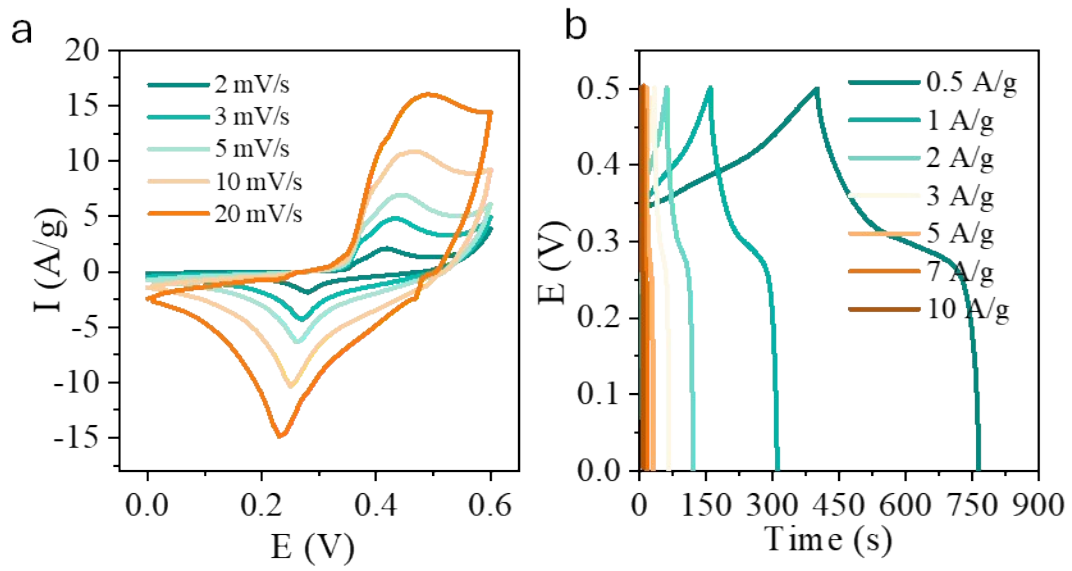

Figure S2. CV curves and GCD-curves of CMO<sub>AH</sub> electrode tested in three-electrode system

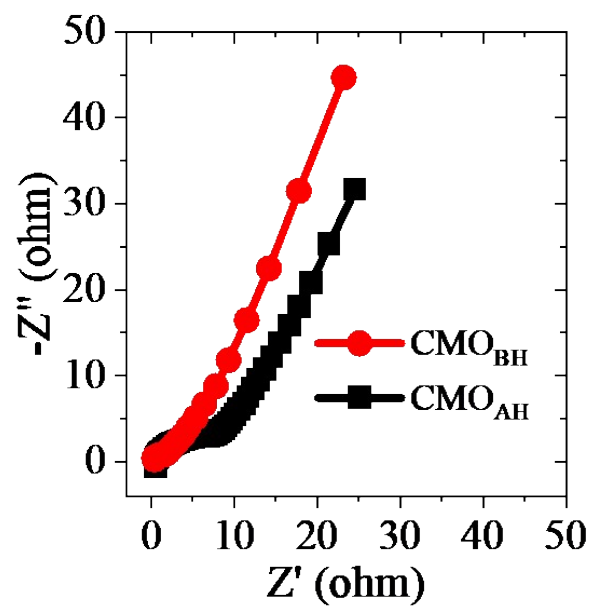

Figure S3. EIS plot of CMO<sub>BH</sub> and CMO<sub>AH</sub> electrodes measured in three-electrode system

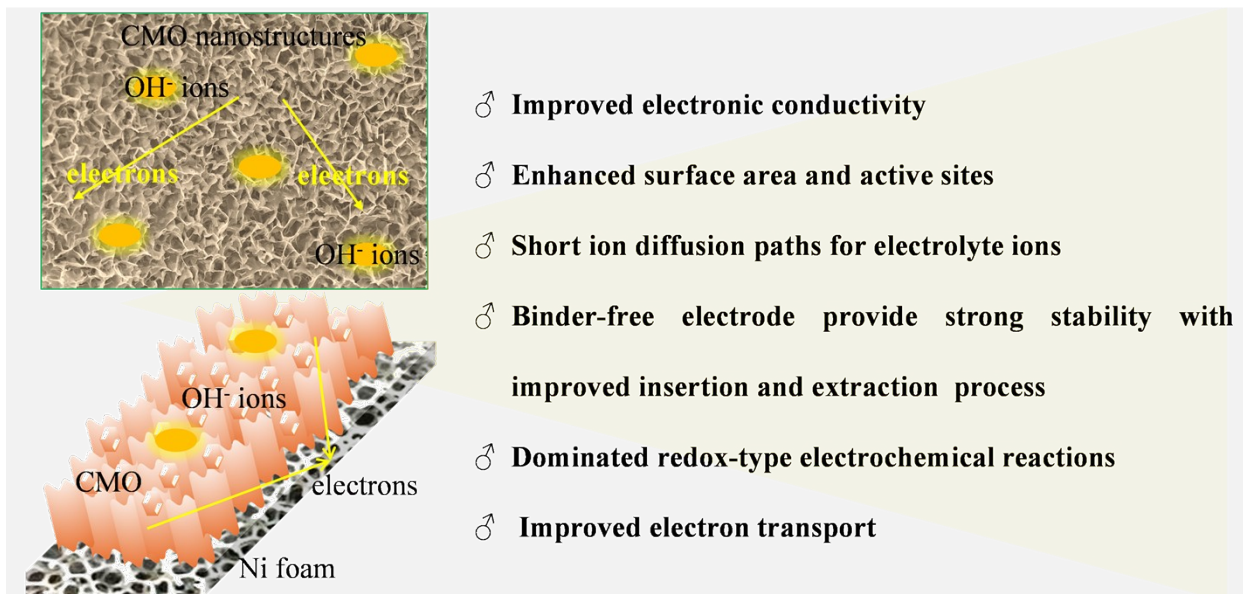

**Figure S4.** Schematics showing the structural advantages of CMO electrode during the charge storage process.

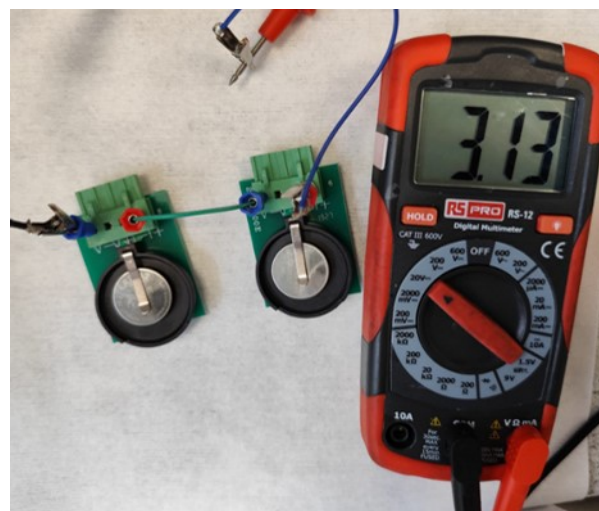

**Figure S5.** Voltage output of two-coin cell-based ASCs measured using multimeter.
